# Supplementary material for: Evidence of intermolecular π-stacking enhancement of second-harmonic generation in a family of single chain magnets
Source: Royal Society of Chemistry journal article supplement (doi:10.1039/b604985k), 2006-01-01
Supplement: b604985k.pdf [file b604985k.pdf]

## Supplementary Material to:

### Evidences of intermolecular $\pi$ -Stacking Enhancement of Second-Harmonic Generation in a Family of Single Chain Magnets

Lapo Bogani,<sup>\*a,b</sup> Lucia Cavigli,<sup>a,b</sup> Kevin Bernot,<sup>a,c</sup> Roberta Sessoli,<sup>\*a</sup> Massimo Gurioli,<sup>b</sup> and Dante Gatteschi

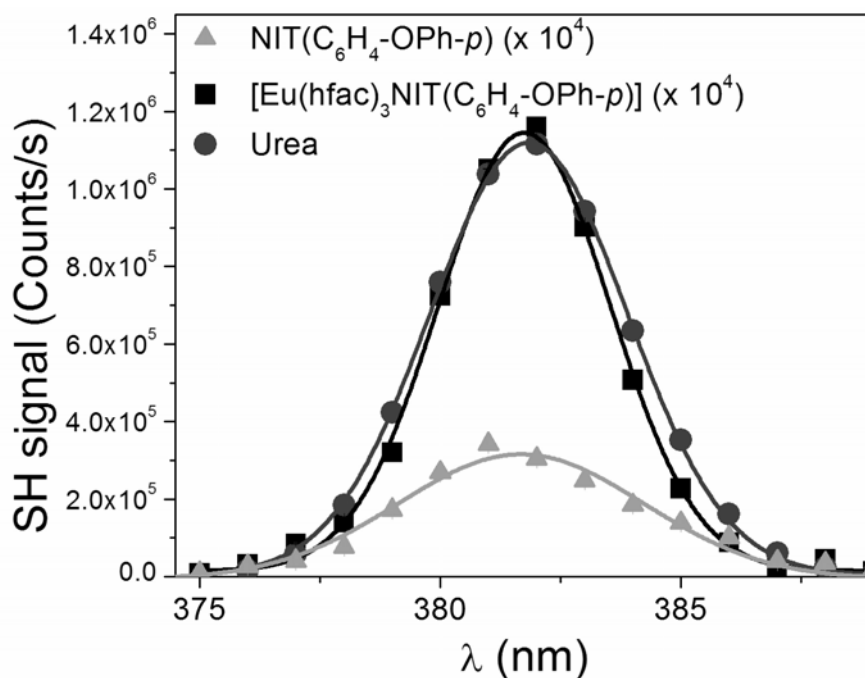

Supplementary Information 1 Spectral dispersion of the Fundamental and SHG beams

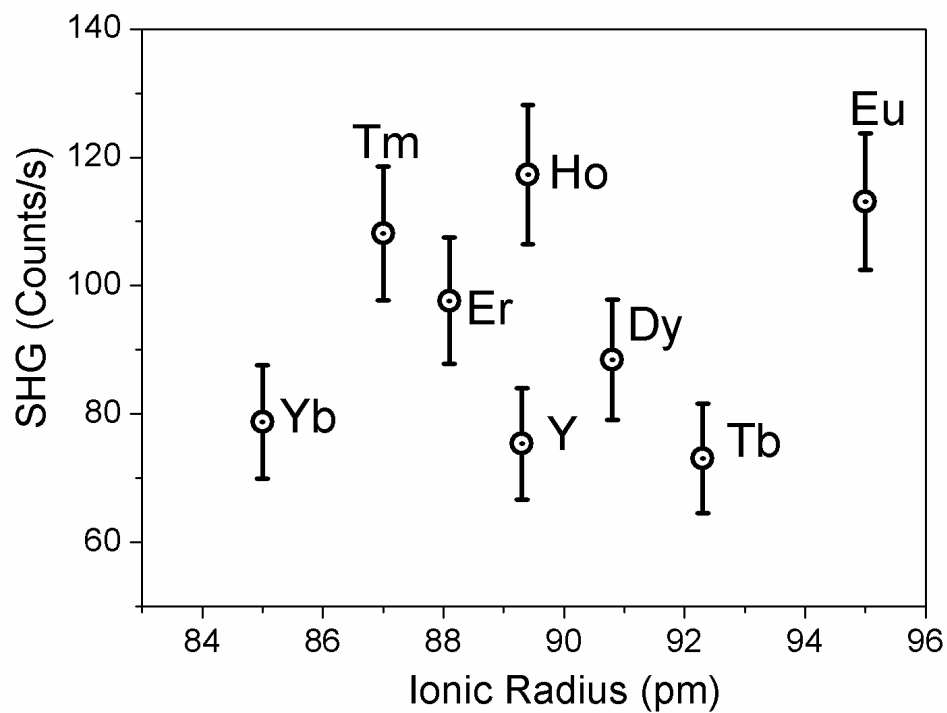

**Supplementary Information 2** SHG Intensity as a function of the ionic radius of the rare-earths.

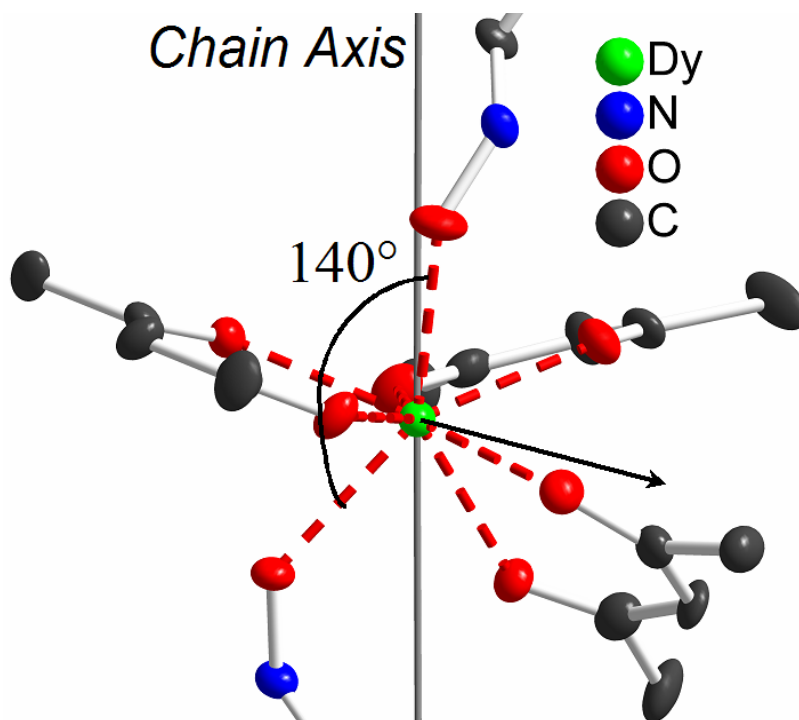

**Supplementary Information 3** Coordination geometry around the rare-earth metal centre. The Radical oxygen –Metal– Radical oxygen angle is reported. The black arrow represents the direction of an hypothetical *cis* coordination of the radicals.
